# Supplementary material for: Identification of Immune and Hypoxia Risk Classifier to Estimate Immune Microenvironment and Prognosis in Cervical Cancer
Source: Hindawi journal article supplement (doi:10.1155/2022/6906380), 2022-10-17
Supplement: f2 [file 6906380.f2.zip]

Supplementary Table 2: Potential function of the target miRNAs.

| Category | Term                                  | Count | Percent  | Fold     | P-value  | FDR      |
|----------|---------------------------------------|-------|----------|----------|----------|----------|
| Function | Apoptosis                             | 24    | 0.226415 | 8.283019 | 4.01E-18 | 2.35E-15 |
| Function | Immune Response                       | 24    | 0.26087  | 9.543478 | 1.01E-19 | 8.90E-17 |
| Function | Aging                                 | 20    | 0.31746  | 11.61376 | 4.02E-18 | 1.76E-15 |
| Function | Inflammation                          | 20    | 0.178571 | 6.532738 | 8.86E-13 | 1.30E-10 |
| Function | Regulation of Stem Cell               | 20    | 0.253165 | 9.261603 | 6.13E-16 | 1.54E-13 |
| Function | Cell Death                            | 18    | 0.230769 | 8.442308 | 1.58E-13 | 3.08E-11 |
| Function | Hormone-mediated<br>Signaling Pathway | 18    | 0.310345 | 11.35345 | 4.68E-16 | 1.37E-13 |
| Function | Cell Cycle                            | 17    | 0.204819 | 7.492972 | 7.42E-12 | 8.14E-10 |
| Function | Cell Proliferation                    | 16    | 0.2      | 7.316667 | 5.36E-11 | 5.23E-09 |
