# Supplementary material for: Identification of Immune and Hypoxia Risk Classifier to Estimate Immune Microenvironment and Prognosis in Cervical Cancer
Source: J Oncol. 2022 Oct 17;2022:6906380. doi: 10.1155/2022/6906380 (PMC9593224; doi:10.1155/2022/6906380)
Supplement: Supplementary 1 — Supplementary Table 1: the list of hypoxia-related genes. [file 6906380.f1.zip]

Archive with 2 entries (2 files):
- Supplementary Table 1 (1).pdf
- Supplementary Table 1.docx
