# Supplementary material for: Identification of Immune and Hypoxia Risk Classifier to Estimate Immune Microenvironment and Prognosis in Cervical Cancer
Source: J Oncol. 2022 Oct 17;2022:6906380. doi: 10.1155/2022/6906380 (PMC9593224; doi:10.1155/2022/6906380)
Supplement: Supplementary 2 — Supplementary Table 2: potential function of the target miRNAs. [file 6906380.f2.zip]

Archive with 2 entries (2 files):
- Supplementary Table 2.docx
- Supplementary Table 2.pdf
